# Supplementary material for: Association of the Magnitude of Anti-SARS-CoV-2 Vaccine Side Effects with Sex, Allergy History, Chronic Diseases, Medication Intake, and SARS-CoV-2 Infection
Source: MDPI journal article supplement (doi:10.3390/vaccines12010104), 2024-01-20
Supplement: s1 [file s1]

| Parameters       |                                           | N (%)        |
|------------------|-------------------------------------------|--------------|
| Sex              | Females                                   | 616 (73.25%) |
|                  | Males                                     | 225 (26.75%) |
| Age              | 18-29 years                               | 431 (51.37%) |
|                  | 30-39 years                               | 218 (25.92%) |
|                  | 40-49 years                               | 146 (17.24%) |
|                  | ≥50 years                                 | 46 (5.47%)   |
| Chronic diseases | Total                                     | 136 (11.89%) |
|                  | Type 1 diabetes mellitus                  | 6 (0.71%)    |
|                  | Type 2 diabetes mellitus                  | 13 (1.55%)   |
|                  | Hypertension                              | 23 (2.7%)    |
|                  | Type 1 diabetes mellitus and hypertension | 1 (0.12%)    |
|                  | Type 2 diabetes mellitus and hypertension | 2 (0.24%)    |
|                  | Autoimmune diseases                       | 12 (1.43%)   |
|                  | Other                                     | 52 (6.2 %)   |

**Supplementary Table S1. Characteristics of the participants.**

| <b>Vaccine</b>           | <b>First dose N (%)</b> | <b>Second dose N (%)</b> | <b>Third dose N (%)</b> |
|--------------------------|-------------------------|--------------------------|-------------------------|
| <b>BNT162b2</b>          | 702 (83.5%)             | 673 (81.2%)              | 101 (68.2%)             |
| <b>ChAdOx1-S</b>         | 92 (66.2%)              | 98 (11.8%)               | 11 (7.4%)               |
| <b>Sinopharm</b>         | 2 (0.24%)               | 3 (0.36%)                | 0                       |
| <b>MRNA-1273</b>         | 0                       | 1 (0.12)                 | 2 (1.35%)               |
| <b>Ad26.COVS. S</b>      | 1 (0.12%)               | 0                        | 0                       |
| <b>Sputnik V</b>         | 1 (0.12%)               | 1 (0.12%)                | 0                       |
| <b>Sinovac-Coronavac</b> | 1 (0.12%)               | 0                        | 0                       |
| <b>Other</b>             | 1 (0.12%)               | 2 (0.24%)                | 1 (0.7%)                |
| <b>Do not know</b>       | 41 (4.9%)               | 51 (6.2%)                | 33 (22.3%)              |

**Supplementary Table S2. Type and number of doses of the anti-SARS-COV-2 vaccines administrated to the participants**

| First Dose All Vaccines; N (%)  |                         |                    |            |          |
|---------------------------------|-------------------------|--------------------|------------|----------|
|                                 | Did not Develop Allergy | Developped Allergy | Odds Ratio | P-Value  |
| No Allergy                      | 709 (99.44%)            | 4 (0.56%)          | 0.11       | 0.000062 |
| Having Allergy                  | 120 (95.24%)            | 6 (4.76%)          |            |          |
| Second Dose All Vaccines; N (%) |                         |                    |            |          |
|                                 | Did not Develop Allergy | Developped Allergy |            |          |
| No Allergy                      | 698 (99.43%)            | 4 (0.57%)          | 0.23       | 0.041    |
| Having Allergy                  | 123 (97.62%)            | 3 (2.38%)          |            |          |
| First Dose BNT162b2; N (%)      |                         |                    |            |          |
|                                 | Did not Develop Allergy | Developped Allergy |            |          |
| No Allergy                      | 595 (99.5%)             | 3 (0.5%)           | 0.1        | 0.000134 |
| Having Allergy                  | 99 (95.19%)             | 5 (4.81%)          |            |          |
| Second Dose BNT162b2; N (%)     |                         |                    |            |          |
|                                 | Did not Develop Allergy | Developped Allergy |            |          |
| No Allergy                      | 587 (99.49%)            | 3 (0.51%)          | 0.17       | 0.016    |
| Having Allergy                  | 101 (97.12%)            | 3 (2.88%)          |            |          |
| First Dose ChAdOx1-S; N (%)     |                         |                    |            |          |
|                                 | Did not Develop Allergy | Developped Allergy |            |          |
| No Allergy                      | 73 (98.65%)             | 1 (1.35%)          | 0.21       | 0.23     |
| Having Allergy                  | 15 (93.75%)             | 1 (6.25%)          |            |          |
| Second Dose ChAdOx1-S; N (%)    |                         |                    |            |          |
|                                 | Did not Develop Allergy | Developped Allergy |            |          |
| No Allergy                      | 73 (100%)               | 0 (0%)             | 0          | 0.23     |
| Having Allergy                  | 15 (93.75%)             | 1 (6.25%)          |            |          |

**Supplementary Table S3. The association between having a history of allergy and developing allergy upon vaccination**

| Number of infections with SARS-CoV-2 | Side effect magnitude; N (%) |             |            | Odds Ratio |              |              | P value  |
|--------------------------------------|------------------------------|-------------|------------|------------|--------------|--------------|----------|
|                                      | None                         | Mild        | Strong     | None/ Mild | None/ Strong | Mild/ Strong |          |
| First dose                           |                              |             |            |            |              |              |          |
| None                                 | 99 (24.5%)                   | 259 (64.1%) | 46 (11.4%) | 0.99       | 0.94         | 0.95         | 0.965    |
| One                                  | 105 (24.1%)                  | 278 (63.9%) | 52 (12%)   |            |              |              |          |
| None and one                         | 204 (24.3%)                  | 537 (64%)   | 98 (11.7%) | 1.24       | 1.44         | 1.16         | 0.41     |
| Two                                  | 33 (28.9%)                   | 70 (61.4%)  | 11 (9.7%)  |            |              |              |          |
| None                                 | 99 (24.5%)                   | 259 (64.1%) | 46 (11.4%) | 1.23       | 1.39         | 1.13         | 0.31     |
| Two                                  | 33 (28.9%)                   | 70 (61.4%)  | 11 (9.7%)  |            |              |              |          |
| None                                 | 99 (24.5%)                   | 259 (64.1%) | 46 (11.4%) | 1.04       | 1.02         | 0.98         | 0.97     |
| One and Two                          | 138 (25.1%)                  | 348 (63.4%) | 63 (11.5%) |            |              |              |          |
| One                                  | 105 (24.1%)                  | 278 (63.9%) | 52 (12%)   | 1.25       | 1.49         | 1.19         | 0.31     |
| Two                                  | 33 (28.9%)                   | 70 (61.4%)  | 11 (9.7%)  |            |              |              |          |
| Second dose                          |                              |             |            |            |              |              |          |
| None                                 | 143 (35.6%)                  | 226 (56.4%) | 32 (8%)    | 0.62       | 0.44         | 0.70         | 0.001    |
| One                                  | 105 (24.6%)                  | 268 (62.8%) | 54 (12.6%) |            |              |              |          |
| None and one                         | 248 (29.9%)                  | 494 (59.7%) | 86 (10.4%) | 0.58       | 0.36         | 0.63         | 0.002    |
| Two                                  | 21 (18.6%)                   | 72 (63.7%)  | 20 (17.7%) |            |              |              |          |
| None                                 | 143 (35.6%)                  | 226 (56.4%) | 32 (8%)    | 0.46       | 0.23         | 0.51         | 0.000189 |
| Two                                  | 21 (18.6%)                   | 72 (63.7%)  | 20 (17.7%) |            |              |              |          |
| None                                 | 143 (35.6%)                  | 226 (56.4%) | 32 (8%)    | 0.59       | 0.38         | 0.65         | 0.001    |
| One and Two                          | 126 (23.3%)                  | 340 (63%)   | 74 (13.7%) |            |              |              |          |
| One                                  | 105 (24.5%)                  | 268 (62.9%) | 54 (12.6%) | 0.74       | 0.54         | 0.73         | 0.068    |
| Two                                  | 21 (18.6%)                   | 72 (63.7%)  | 20 (17.7%) |            |              |              |          |
| Third dose                           |                              |             |            |            |              |              |          |
| None                                 | 21 (32.8%)                   | 42 (65.6%)  | 1 (1.56%)  | 0.97       | 0.29         | 0.29         | 0.54     |
| One                                  | 18 (31%)                     | 37 (63.8%)  | 3 (5.2%)   |            |              |              |          |
| None and one                         | 39 (32%)                     | 79 (64.8%)  | 4 (3.2%)   | 0.89       | 0.18         | 0.20         | 0.054    |
| Two                                  | 7 (25.9%)                    | 16 (59.3%)  | 4 (14.8%)  |            |              |              |          |
| None                                 | 21 (32.8%)                   | 42 (65.6%)  | 1 (1.6%)   | 0.88       | 0.08         | 0.10         | 0.039    |
| Two                                  | 7 (25.9%)                    | 16 (59.3%)  | 4 (14.8%)  |            |              |              |          |
| None                                 | 21 (32.8%)                   | 42 (65.6%)  | 1 (1.56%)  | 0.94       | 0.17         | 0.18         | 0.199    |
| One and Two                          | 25 (29.4%)                   | 53 (62.4%)  | 7 (8.2%)   |            |              |              |          |
| One                                  | 18 (31%)                     | 37 (63.8%)  | 3 (5.2%)   | 0.90       | 0.29         | 0.32         | 0.32     |
| Two                                  | 7 (25.9%)                    | 16 (59.3%)  | 4 (14.8%)  |            |              |              |          |

**Supplementary Table S4. The infection with the SARS-CoV-2 and the magnitude of the side effects after the anti-SARS-CoV-2 vaccination.**

| Number of infections with SARS-CoV-2 | Side effect magnitude; N (%) |             |            | Odds Ratio |              |              | P value |
|--------------------------------------|------------------------------|-------------|------------|------------|--------------|--------------|---------|
|                                      | None                         | Mild        | Strong     | None/ Mild | None/ Strong | Mild/ Strong |         |
| First dose                           |                              |             |            |            |              |              |         |
| None                                 | 85 (25.2%)                   | 211 (62.6%) | 41 (12.2%) | 0.81       | 0.88         | 1.08         | 0.85    |
| One                                  | 60 (21.7%)                   | 184 (66.4%) | 33 (11.9%) |            |              |              |         |
| None and one                         | 145 (23.6%)                  | 395 (64.3%) | 74 (12.1%) | 1.52       | 2.11         | 1.39         | 0.125   |
| Two                                  | 29 (33%)                     | 52 (59%)    | 7 (8%)     |            |              |              |         |
| None                                 | 85 (25.2%)                   | 211 (62.6%) | 41 (12.2%) | 1.38       | 2.00         | 1.44         | 0.248   |
| Two                                  | 29 (33%)                     | 52 (59%)    | 7 (8%)     |            |              |              |         |
| None                                 | 85 (25.2%)                   | 211 (62.6%) | 41 (12.2%) | 0.94       | 1.07         | 1.15         | 0.824   |
| One and Two                          | 89 (24.4%)                   | 236 (64.6%) | 40 (11%)   |            |              |              |         |
| One                                  | 60 (21.7%)                   | 184 (66.4%) | 33 (11.9%) | 1.71       | 2.28         | 1.33         | 0.082   |
| Two                                  | 29 (33%)                     | 52 (59%)    | 7 (8%)     |            |              |              |         |
| Second dose                          |                              |             |            |            |              |              |         |
| None                                 | 119 (35.4%)                  | 188 (56%)   | 29 (8.6%)  | 0.63       | 0.46         | 0.73         | 0.005   |
| One                                  | 89 (24.9%)                   | 222 (62%)   | 47 (13.1%) |            |              |              |         |
| None and one                         | 208 (30%)                    | 410 (59.1%) | 76 (10.9%) | 0.73       | 0.41         | 0.56         | 0.012   |
| Two                                  | 19 (21.8%)                   | 51 (68.6%)  | 17 (19.6%) |            |              |              |         |
| None                                 | 119 (35.4%)                  | 188 (56%)   | 29 (8.6%)  | 0.59       | 0.27         | 0.46         | 0.003   |
| Two                                  | 19 (21.8%)                   | 51 (68.6%)  | 17 (19.6%) |            |              |              |         |
| None                                 | 119 (35.4%)                  | 188 (56%)   | 29 (8.6%)  | 0.62       | 0.41         | 0.66         | 0.004   |
| One and Two                          | 108 (24.3%)                  | 273 (61.3%) | 64 (14.4%) |            |              |              |         |
| One                                  | 89 (24.9%)                   | 222 (62%)   | 47 (13.1%) | 0.93       | 0.59         | 0.64         | 0.118   |
| Two                                  | 19 (21.8%)                   | 51 (68.6%)  | 17 (19.6%) |            |              |              |         |
| Third dose                           |                              |             |            |            |              |              |         |
| None                                 | 18 (31.6)                    | 38 (66.7%)  | 1 (1.8%)   | 0.97       | 0.30         | 0.31         | 0.56    |
| One                                  | 16 (29.6%)                   | 35 (64.8%)  | 3 (5.6%)   |            |              |              |         |
| None and one                         | 34 (30.6%)                   | 73 (65.8%)  | 4 (3.6%)   | 0.92       | 0.35         | 0.38         | 0.52    |
| Two                                  | 6 (27.3%)                    | 14 (63.6%)  | 2 (9.1%)   |            |              |              |         |
| None                                 | 18 (31.6%)                   | 38 (66.7%)  | 1 (1.8%)   | 0.90       | 0.17         | 0.18         | 0.306   |
| Two                                  | 6 (27.3%)                    | 14 (63.6%)  | 2 (9.1%)   |            |              |              |         |
| None                                 | 18 (31.6%)                   | 38 (66.7%)  | 1 (1.8%)   | 0.95       | 0.24         | 0.26         | 0.411   |
| One and Two                          | 22 (28.9%)                   | 49 (64.5%)  | 5 (6.6%)   |            |              |              |         |
| One                                  | 16 (29.6%)                   | 35 (64.8%)  | 3 (5.6%)   | 0.94       | 0.56         | 0.60         | 0.848   |
| Two                                  | 6 (27.3%)                    | 14 (63.6%)  | 2 (9.1%)   |            |              |              |         |

**Supplementary Table S5. The infection with the SARS-CoV-2 and the magnitude of the side effects after the BNT162b2 vaccine.**

| Number of infections with SARS-CoV-2 | Side effect magnitude; N (%) |            |           | Odds Ratio |              |              | P value |
|--------------------------------------|------------------------------|------------|-----------|------------|--------------|--------------|---------|
|                                      | None                         | Mild       | Strong    | None/ Mild | None/ Strong | Mild/ Strong |         |
| First dose                           |                              |            |           |            |              |              |         |
| None                                 | 9 (23.1%)                    | 27 (69.2%) | 3 (7.7%)  | 1.29       | 0.75         | 0.58         | 0.509   |
| One                                  | 9 (26.5%)                    | 21 (61.8%) | 4 (11.8%) |            |              |              |         |
| None and one                         | 18 (24.3%)                   | 48 (64.9%) | 7 (10.8%) | 0.22       | 0.13         | 0.58         | 0.233   |
| Two                                  | 1 (12.4%)                    | 12 (81.3%) | 3 (6.3%)  |            |              |              |         |
| None                                 | 9 (23.1%)                    | 27 (69.2%) | 3 (7.7%)  | 0.25       | 0.11         | 0.44         | 0.213   |
| Two                                  | 1 (12.4%)                    | 12 (81.3%) | 3 (6.3%)  |            |              |              |         |
| None                                 | 9 (23.1%)                    | 27 (69.2%) | 3 (7.7%)  | 0.91       | 0.48         | 0.52         | 0.509   |
| One and Two                          | 10 (19.6%)                   | 33 (64.7%) | 7 (15.7%) |            |              |              |         |
| One                                  | 9 (26.5%)                    | 21 (61.8%) | 4 (11.8%) | 0.19       | 0.15         | 0.76         | 0.267   |
| Two                                  | 1 (12.4%)                    | 12 (81.3%) | 3 (6.3%)  |            |              |              |         |
| Second dose                          |                              |            |           |            |              |              |         |
| None                                 | 12 (30.8%)                   | 26 (66.7%) | 1 (2.6%)  | 0.93       | 0.19         | 0.20         | 0.293   |
| One                                  | 9 (26.5%)                    | 21 (61.8%) | 4 (11.8%) |            |              |              |         |
| None and one                         | 21 (28.8%)                   | 47 (64.4%) | 5 (6.8%)  | 0.34       | 0.48         | 1.38         | 0.386   |
| Two                                  | 2 (12.4%)                    | 13 (81.3%) | 1 (6.3%)  |            |              |              |         |
| None                                 | 12 (30.8%)                   | 26 (66.7%) | 1 (2.6%)  | 0.33       | 0.17         | 0.50         | 0.324   |
| Two                                  | 2 (12.4%)                    | 13 (81.3%) | 1 (6.3%)  |            |              |              |         |
| None                                 | 12 (30.8%)                   | 26 (66.7%) | 1 (2.6%)  | 0.70       | 0.18         | 0.26         | 0.293   |
| One and Two                          | 11 (22%)                     | 34 (68%)   | 5 (10%)   |            |              |              |         |
| One                                  | 9 (26.5%)                    | 21 (61.8%) | 4 (11.8%) | 0.36       | 0.89         | 2.48         | 0.386   |
| Two                                  | 2 (12.4%)                    | 13 (81.3%) | 1 (6.3%)  |            |              |              |         |

**Supplementary Table S6. The infection with the SARS-CoV-2 and the magnitude of the side effects after the ChAdOx1-S vaccine.**
